# Supplementary material
Source: publisher site journal article supplement (https://www.dovepress.com/get_supplementary_file.php?f=345046.docx)
Supplement: Supplementary file 1 [file get_supplementary_file.php]

SUPPLEMENTARY INFORMATION:

(A)


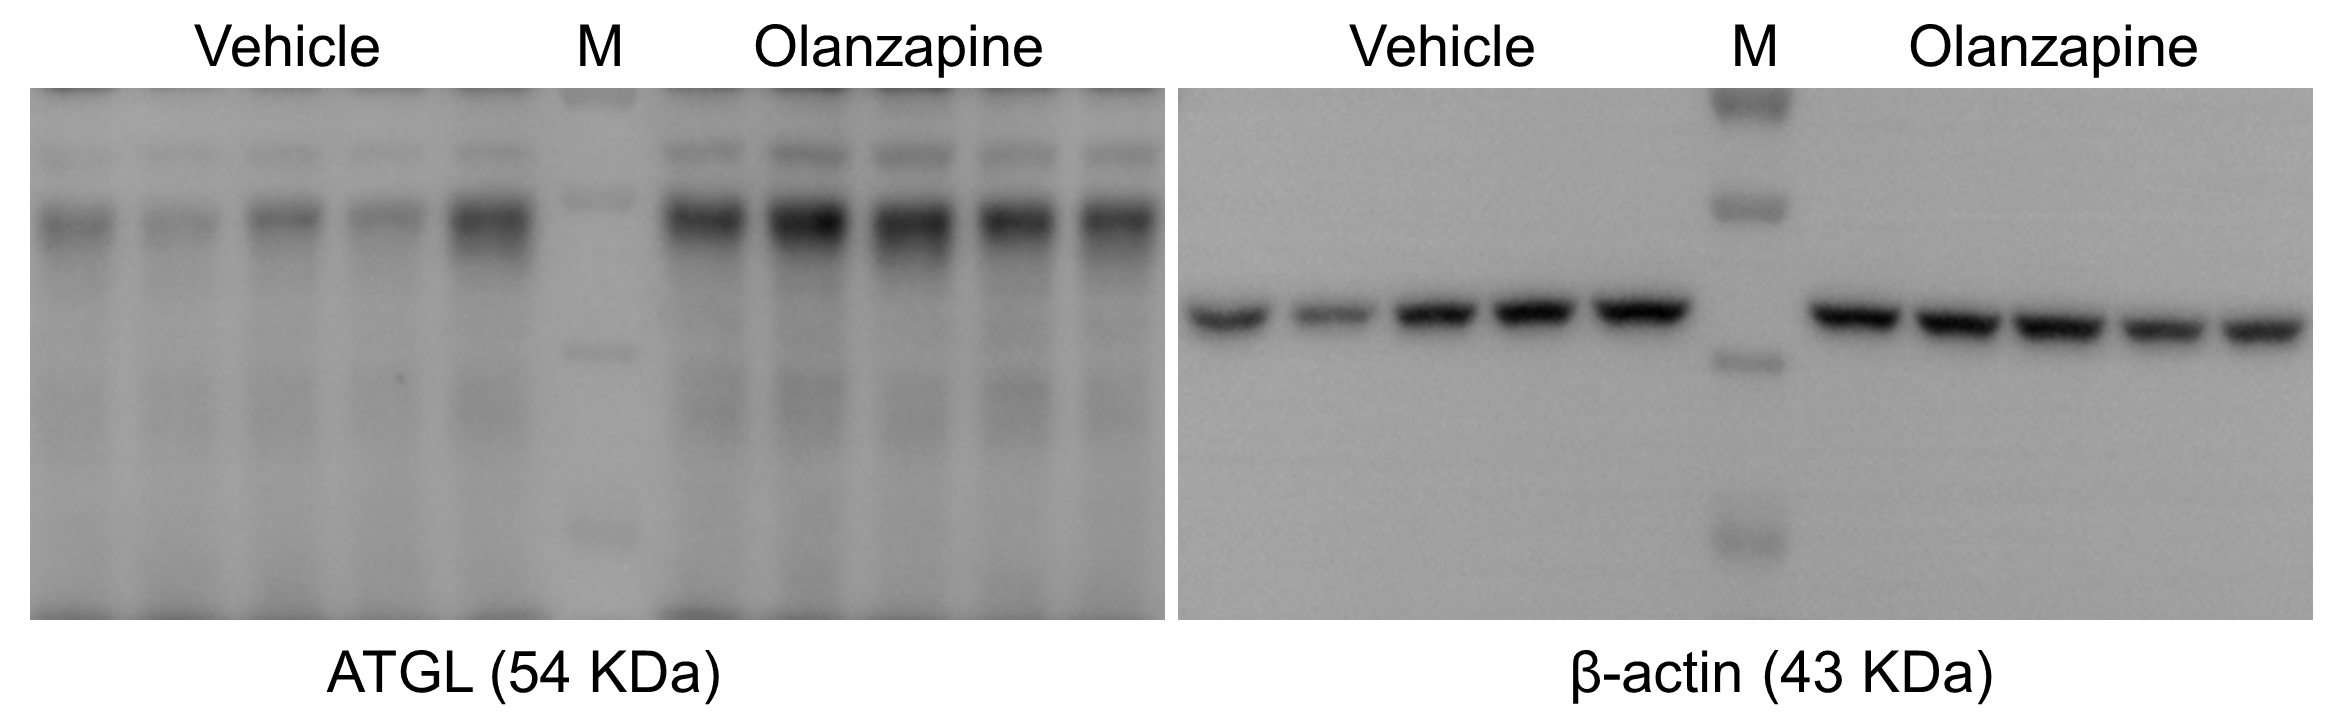


(B)


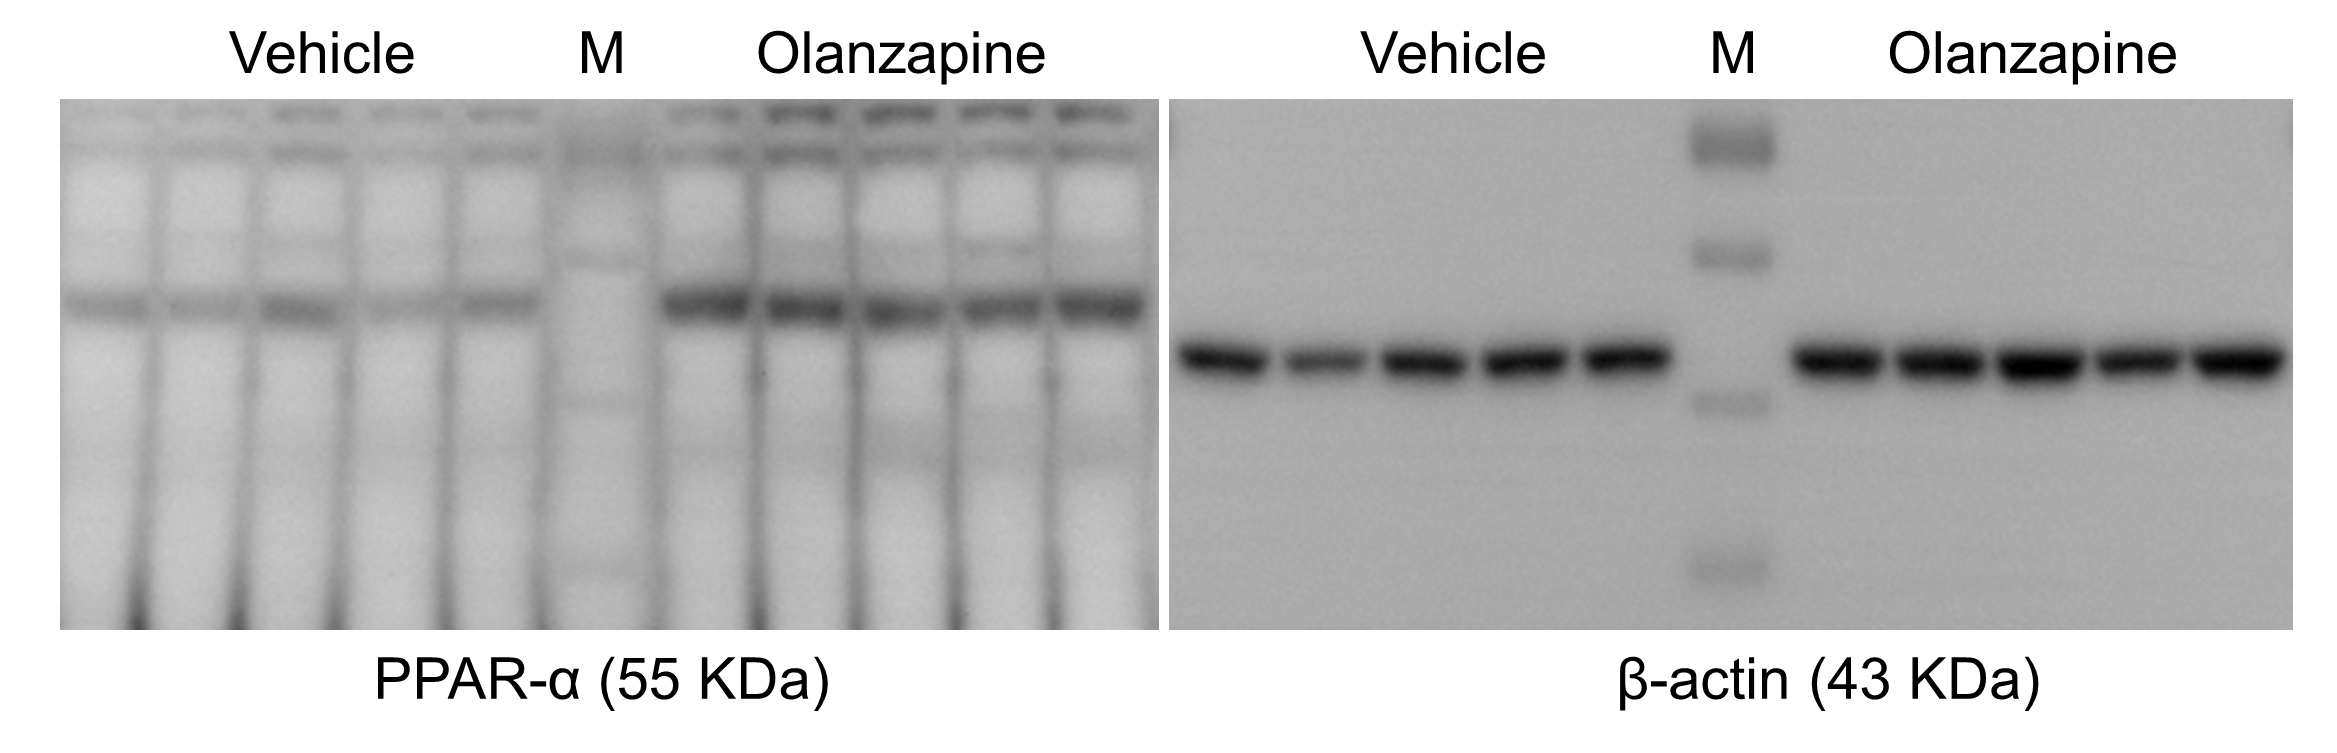


Supplementary Figure 1. Effect of olanzapine on relevant proteins regulated in the liver. Representative western blots of (A) ATGL and (B) PPAR-α in the liver of olanzapine-treated rats. The liver tissue lysates were subjected to SDS-PAGE and immunoprobed with antibodies against ATGL and PPAR-α.
